# Supplementary material for: Melatonin Enhances Palladium-Nanoparticle-Induced Cytotoxicity and Apoptosis in Human Lung Epithelial Adenocarcinoma Cells A549 and H1229
Source: PubMed Central journal article supplement (PMC7222421; doi:10.3390/antiox9040357), 2020-04-24
Supplement: antioxidants-09-00357-s001.pdf [file antioxidants-09-00357-s001.pdf]

| <b>Gene</b>      | <b>List of primers</b>    |
|------------------|---------------------------|
| <b>P53</b>       | F:AGAGACCGTACAGAAGA       |
|                  | R:CTGTAGCATGGGATCCTTT     |
| <b>P21</b>       | F:GTTGCTGTCCGGACTACCG     |
|                  | R:AAAAACAATGCCACCACTCC    |
| <b>Caspase-3</b> | F:AGGGGTCATTTATGGGACA     |
|                  | R:TACACGGGATCTGTTTCTTTG   |
| <b>Cyt C</b>     | F: GCGTGTCCTTGGACTTAGAG   |
|                  | R: GCGGCTGTGTAAGAGTATC    |
| <b>Bax</b>       | F:CGAGCTGATCAGAACCATCA    |
|                  | R:GAAAATGCCTTCCCCTTC      |
| <b>Bcl-2</b>     | F:TAAGCTGTCACAGAGGGGCT    |
|                  | R:TGAAGAGTTCCTCCACCACC    |
| <b>GAPDH</b>     | F:AGGTCGGTGTGAACGGATTG    |
|                  | R:TGTAGACCATGTAGTTGAGGTCA |
